# Supplementary material for: Toxicological Effects of Caco-2 Cells Following Short-Term and Long-Term Exposure to Ag Nanoparticles
Source: Int J Mol Sci. 2016 Jun 21;17(6):974. doi: 10.3390/ijms17060974 (PMC4926506; doi:10.3390/ijms17060974)
Supplement: Supplementary file 1 [file ijms-17-00974-s001.pdf]

# Supplementary Materials: Toxicological Effects of Caco-2 Cells Following Short-Term and Long-Term Exposure to Ag Nanoparticles

Ni Chen, Zheng-Mei Song, Huan Tang, Wen-Song Xi, Aoneng Cao, Yuanfang Liu and Haifang Wang

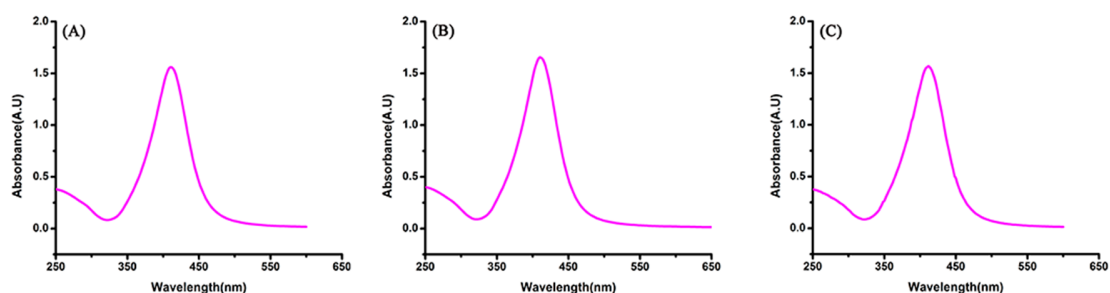

**Figure S1.** UV-VIS spectra of Ag-CIT (A); Ag-B (B) and Ag-PVP (C). The concentration of three Ag NPs is 12.5 µg/mL.

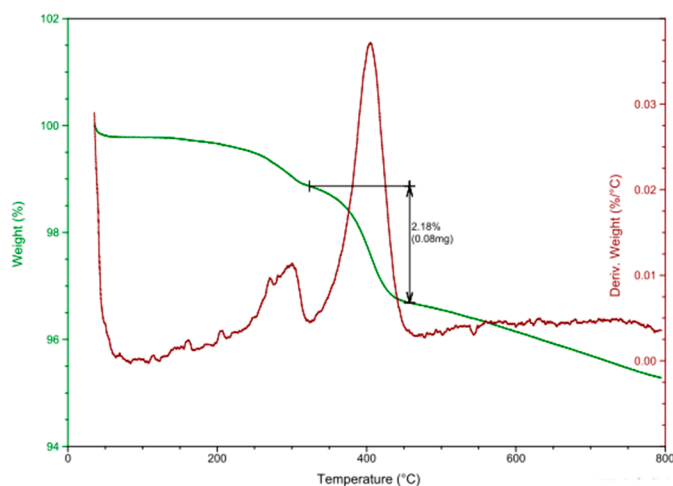

**Figure S2.** TGA thermograms of the synthesized Ag-PVP.

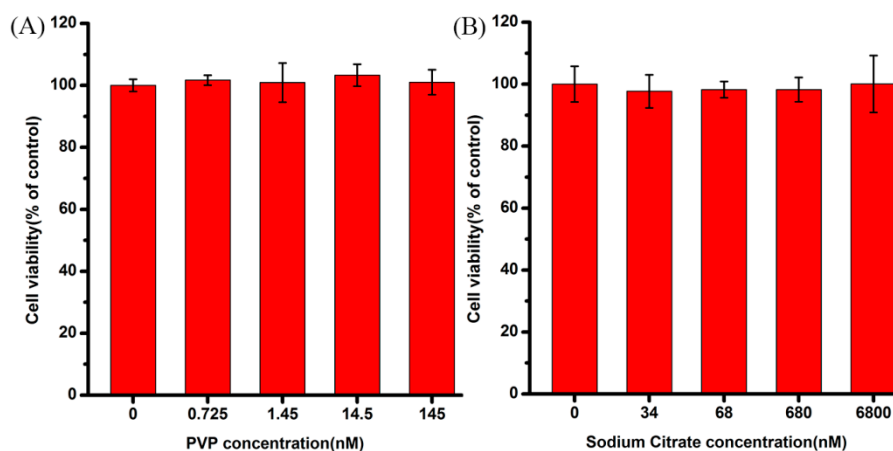

**Figure S3.** The viability assay of Caco-2 cells after being exposed to PVP (A) and sodium citrate (B) with different concentrations for 24 h. All data are represented as the mean  $\pm$  SD ( $n = 6$ ).  $p < 0.05$  comparing with the 0 nM control.

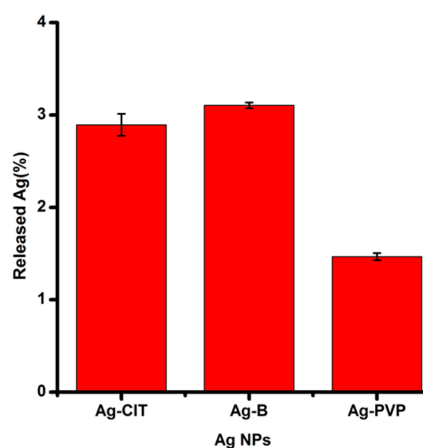

**Figure S4.** The released Ag from three Ag NPs in culture media. All data are represented as the mean  $\pm$  SD ( $n = 3$ ).

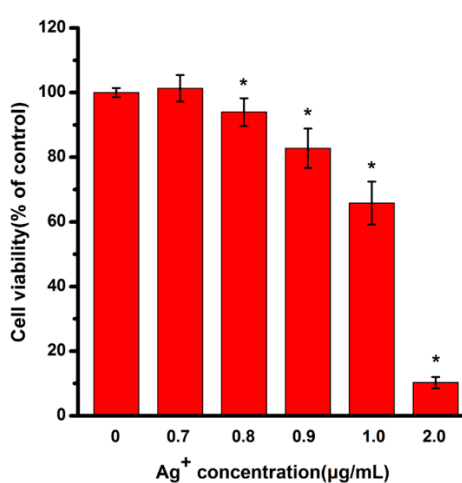

**Figure S5.** The viability assay of Caco-2 cells after being exposed to silver ions for 24 h. All data are represented as the mean  $\pm$  SD ( $n = 6$ ). \*  $p < 0.05$  comparing with the 0  $\mu\text{g/mL}$  control.

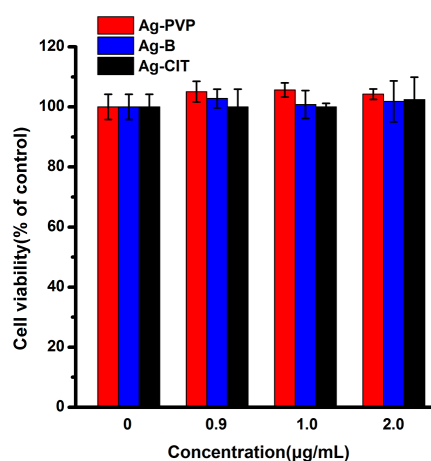

**Figure S6.** The viability assay of Caco-2 cells after being exposed to the supernatant containing dissolved Ag from Ag NPs for 24 h. All data are represented as the mean  $\pm$  SD ( $n = 6$ ).  $p < 0.05$  comparing with the 0  $\mu\text{g/mL}$  control.
